# Supplementary material for: Surface inducing high-temperature superconductivity in layered metal carborides Li2BC3 and LiBC by metallizing σ electrons
Source: Royal Society of Chemistry journal article supplement (doi:10.1039/d4nr01482k), 2024-01-01
Supplement: d4nr01482k1.pdf [file d4nr01482k1.pdf]

# Supporting information for “Surface inducing high-temperature superconductivity in layered metal carbides $\text{Li}_2\text{BC}_3$ and $\text{LiBC}$ by metallizing $\sigma$ electrons”

Muyao Wang<sup>1</sup>, Xiaohan Liu<sup>1</sup>, Xiaowei Huang<sup>1†</sup>, Liangliang Liu<sup>1,2,3\*</sup>

<sup>1</sup>Key Laboratory for Special Functional Materials of Ministry of Education, School of Materials Science and Engineering, Henan University, Kaifeng, 475004, China

<sup>2</sup>Institute of Quantum Materials and Physics, Henan Academy of Sciences, Zhengzhou, 450046, China

<sup>3</sup>Joint Center for Theoretical Physics, Henan University, Kaifeng 475004, China

## 1. The electronic structures and electron-phonon coupling of bulk $\text{Li}_2\text{BC}_3$ .

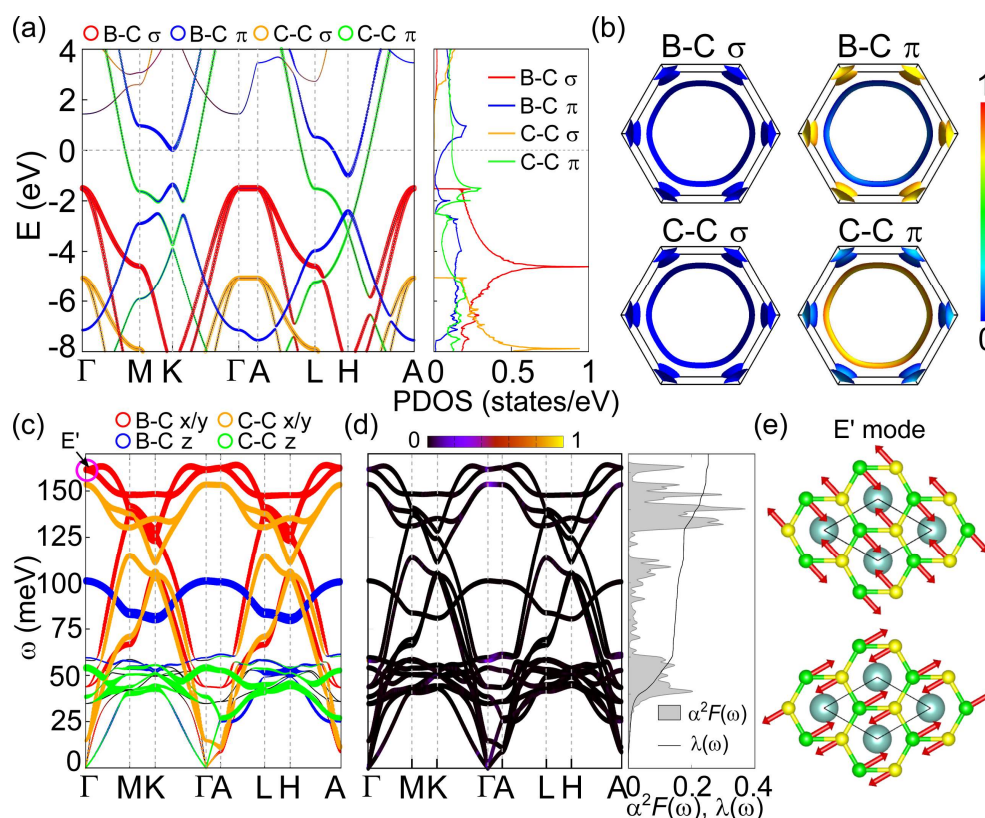

Figure S1: (a) Calculated band structure and partial density of states (PDOS), together with projection of their electronic states onto the  $\sigma$ -bonding states of B-C/C-C  $p_x/p_y$  orbitals and the  $\pi$ -bonding states of B-C/C-C  $p_z$  orbitals, respectively. (b) The corresponding Fermi sheets. The electronic states on the Fermi surface (FS) are projected onto B-C/C-C  $\sigma$  orbitals and B-C/C-C  $\pi$  orbitals, respectively. (c) The calculated phonon spectrums with projection of the in-plane and out-of-plane vibration modes of the B-C/C-C layers. (d) Phonon spectrum with projection of EPC strength  $\lambda_{qv}$  using the color scale in the range [0, 1]. (e) The vibration patterns  $E'$  of two B-C in-plane stretching modes, as marked in (c).

Here, we note that because B-C/C-C  $\sigma$  states are far away from the  $E_F$  and the dominant B-C/C-C  $\pi$  states have weak coupling with B-C/C-C out-of-plane vibrations,

the obtained total  $\lambda$  is only 0.23. Accordingly, the estimated  $T_c$  is smaller than 1 K for the bulk  $\text{Li}_2\text{BC}_3$ .

## 2. All configurations of $\text{Li}_2\text{BC}_3$ and $\text{LiBC}$ (0001) surfaces and corresponding surface energies

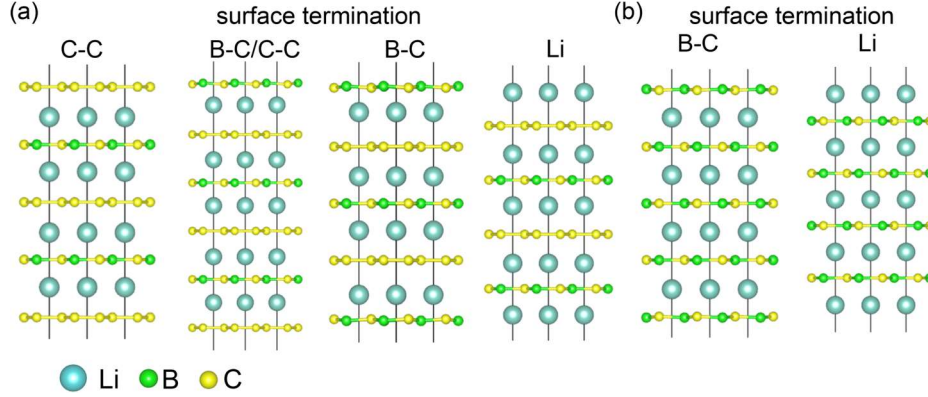

Figure S2: The possible configurations with different terminations for (a)  $\text{Li}_2\text{BC}_3$  and (b)  $\text{LiBC}$  (0001) surfaces.

| Surface termination                  | $E_{surf}$ (eV/Å <sup>2</sup> ) | Surface termination    | $E_{surf}$ (eV/Å <sup>2</sup> ) |
|--------------------------------------|---------------------------------|------------------------|---------------------------------|
| ( $\text{Li}_2\text{BC}_3$ ) C-C     | 0.051                           | ( $\text{LiBC}$ ) Li   | 0.165                           |
| ( $\text{Li}_2\text{BC}_3$ ) B-C/C-C | 0.078                           | ( $\text{LiBC}$ ) B-C  | 0.195                           |
| ( $\text{Li}_2\text{BC}_3$ ) B-C     | 0.106                           | ( $\text{AlB}_2$ ) B-B | 0.097                           |
| ( $\text{Li}_2\text{BC}_3$ ) Li      | 0.117                           | ( $\text{AlB}_2$ ) Al  | 0.060                           |

Table S1: The calculated surface energies ( $E_{surf}$ ) of different  $\text{Li}_2\text{BC}_3$  and  $\text{LiBC}$  (0001) surface configurations. The calculated equation is below:  $E_{surf} = \frac{E_{slab} - E_{bulk}}{2 \times S}$ , in which  $E_{slab}$  and  $E_{bulk}$  are the total energies of the surface slab and bulk configurations, respectively.  $S$  is the surface area of the slab configuration, and the number 2 represents the upper and down surfaces of the slab configurations.

For the (0001) surfaces of  $\text{Li}_2\text{BC}_3$  and  $\text{LiBC}$ , there could be different atomic layers as the terminated surface. Figures S2(a)-(b) show all kinds of configurations of  $\text{Li}_2\text{BC}_3$  and  $\text{LiBC}$  (0001) surfaces, and the corresponding surface energies are listed in Table S1. It is noted that  $\text{Li}_2\text{BC}_3$  (0001) surface with symmetrical C-C termination [see Figure S2 (a)] has the lowest energies of 0.051 eV/Å<sup>2</sup>, while this surface cannot have the high- $T_c$  superconductivity because near Fermi level, the dominant components are B-C/C-C  $\pi$  states, which has weak electron-phonon coupling, similar to the case of bulk  $\text{Li}_2\text{BC}_3$  [see Figure S1]. For our predicted  $\text{Li}_2\text{BC}_3$  (0001) surfaces with symmetrical B-C termination or unsymmetrical B-C and C-C terminations [see Figure S2(a)], which could host high- $T_c$  surface superconductivity, the results show they all have slightly higher surface energies of 0.106 eV/Å<sup>2</sup> and 0.078 eV/Å<sup>2</sup> [see Table S1]. For another

LiBC (0001) surface, there are two possible surface configurations with symmetrical B-C termination or Li termination [see Figure S2(b)]. The calculated surface energy displays that LiBC (0001) surface with symmetrical Li termination has a lower energy of  $0.165 \text{ eV/\AA}^2$ , and B-C terminated surface has a disadvantage in energy, about  $0.03 \text{ eV/\AA}^2$ .

Therefore, for our predicted high- $T_c$  surface systems, that is,  $\text{Li}_2\text{BC}_3$  (0001) surfaces with symmetrical B-C termination or unsymmetrical B-C and C-C terminations and LiBC (0001) surface with B-C termination, we hope that the targeted experiments are able to synthesize these high-quality surface samples and further verify our predictions of high-temperature superconductivity by the advanced experimental technology, considering  $\text{AlB}_2$  (0001) surface with the B-B termination have been synthesized in previous researches [1] although it has a higher surface energy based on our calculations [see Table S1].

### 3. The structure, band structure, density of states of $\text{Li}_2\text{BC}_3$ with unsymmetrical B-C and C-C terminations.

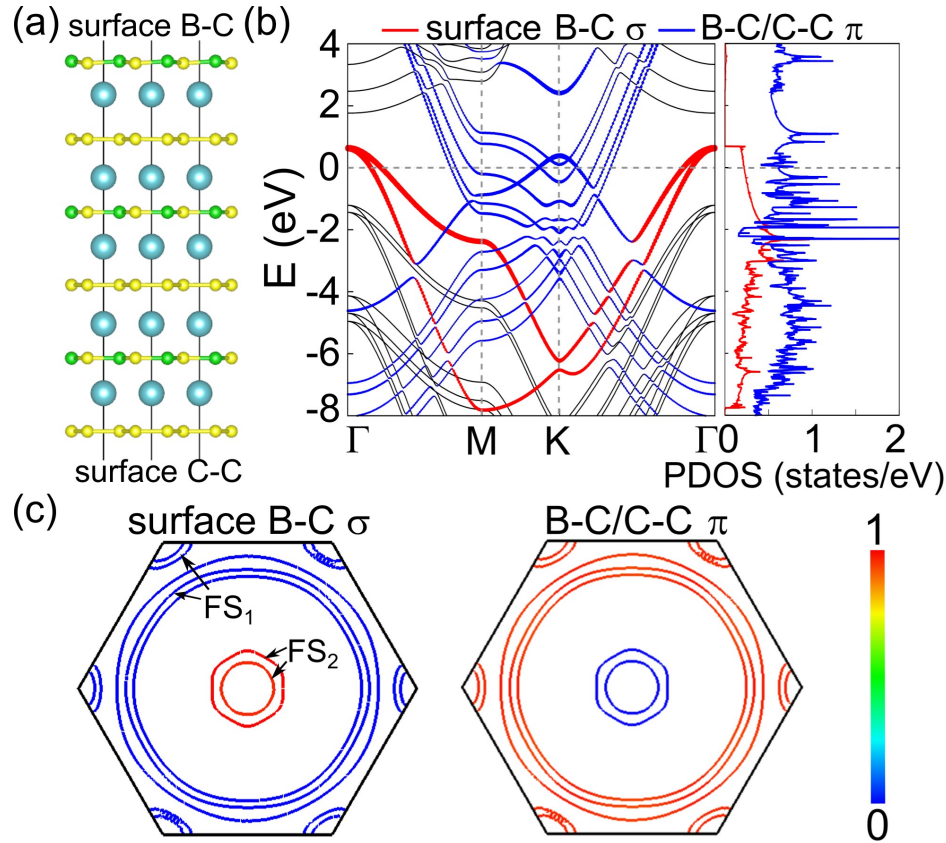

Figure S3: (a) The optimized configuration of  $\text{Li}_2\text{BC}_3$  (0001) surface with unsymmetrical B-C and C-C terminations. (b) Calculated band structure and partial density of states (PDOS), together with projection of their electronic states onto projected onto the surface B-C  $\sigma$  orbitals and all B-C  $\pi$  orbitals, respectively. (c) The corresponding Fermi sheets. The electronic states on the Fermi surface are projected onto surface B-C  $\sigma$  orbitals and all B-C  $\pi$  orbitals, respectively.

4. The superconducting properties of  $\text{Li}_2\text{BC}_3$  with unsymmetrical B-C and C-C terminations.

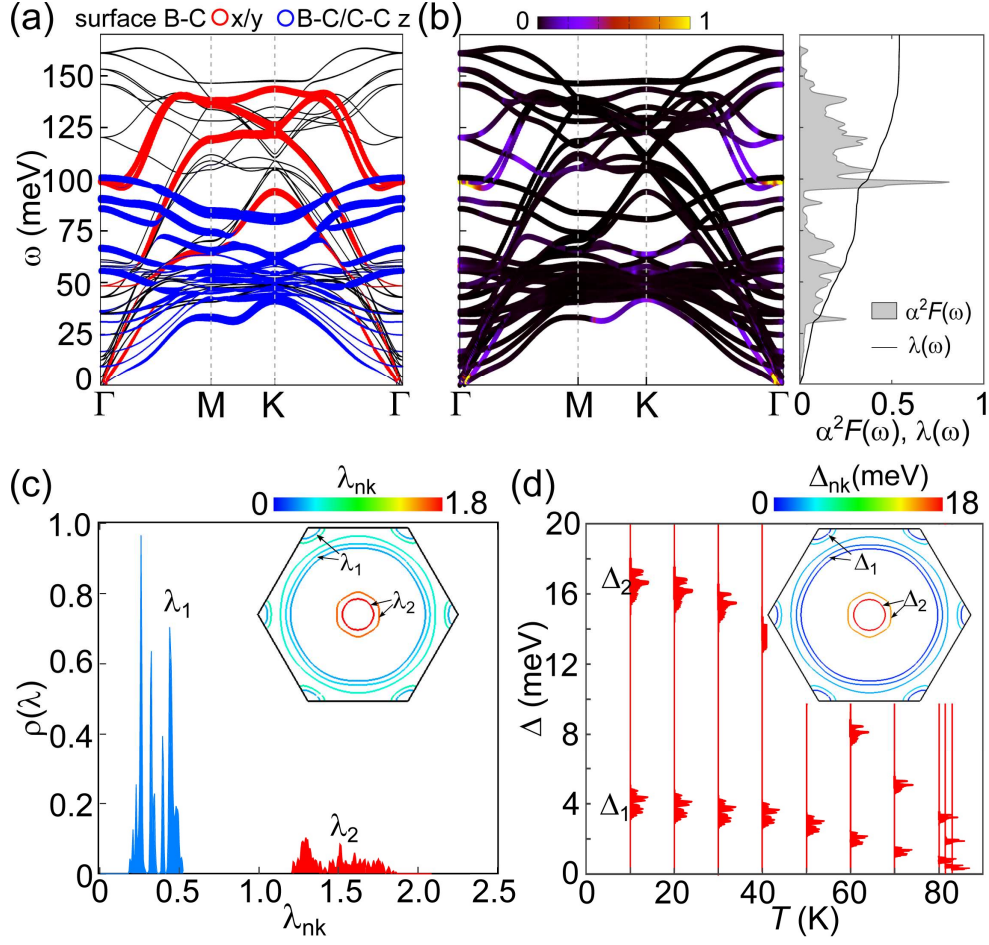

Figure S4: (a) Phonon spectrums with the projection of surface B-C in-plane vibrations and all B-C/C-C out-of-plane vibrations. (b) Phonon spectrum with projection of EPC strength  $\lambda_{\text{qy}}$  using the color scale in the range  $[0, 1]$ , and the isotropic Eliashberg spectral function  $\alpha^2F(\omega)$  with the integrated isotropic EPC constant  $\lambda(\omega)$ . (c) Distribution  $\rho(\lambda)$  of  $k$ -resolved EPC constant  $\lambda_{\text{nk}}$  associated with the projection of the  $\lambda_{\text{nk}}$  onto each FS sheet. The two separated regimes of  $\lambda_{\text{nk}}$  are indicated as  $\lambda_1$  and  $\lambda_2$ . (d) Energy distribution of the anisotropic superconducting gap  $\Delta$  of  $\text{Li}_2\text{BC}_3$  surface as a function of temperature  $T$ . The two separated gaps are indicated as  $\Delta_1$  and  $\Delta_2$ . The inset is  $k$ -resolved superconducting gaps  $\Delta_{\text{nk}}$  on the Fermi surface at 10 K. Here, the obtained  $T_c$  is  $\sim 83$  K.

5. The structures, band structures and density of states of  $\text{Li}_2\text{BC}_3$  surface modes with different layer thicknesses.

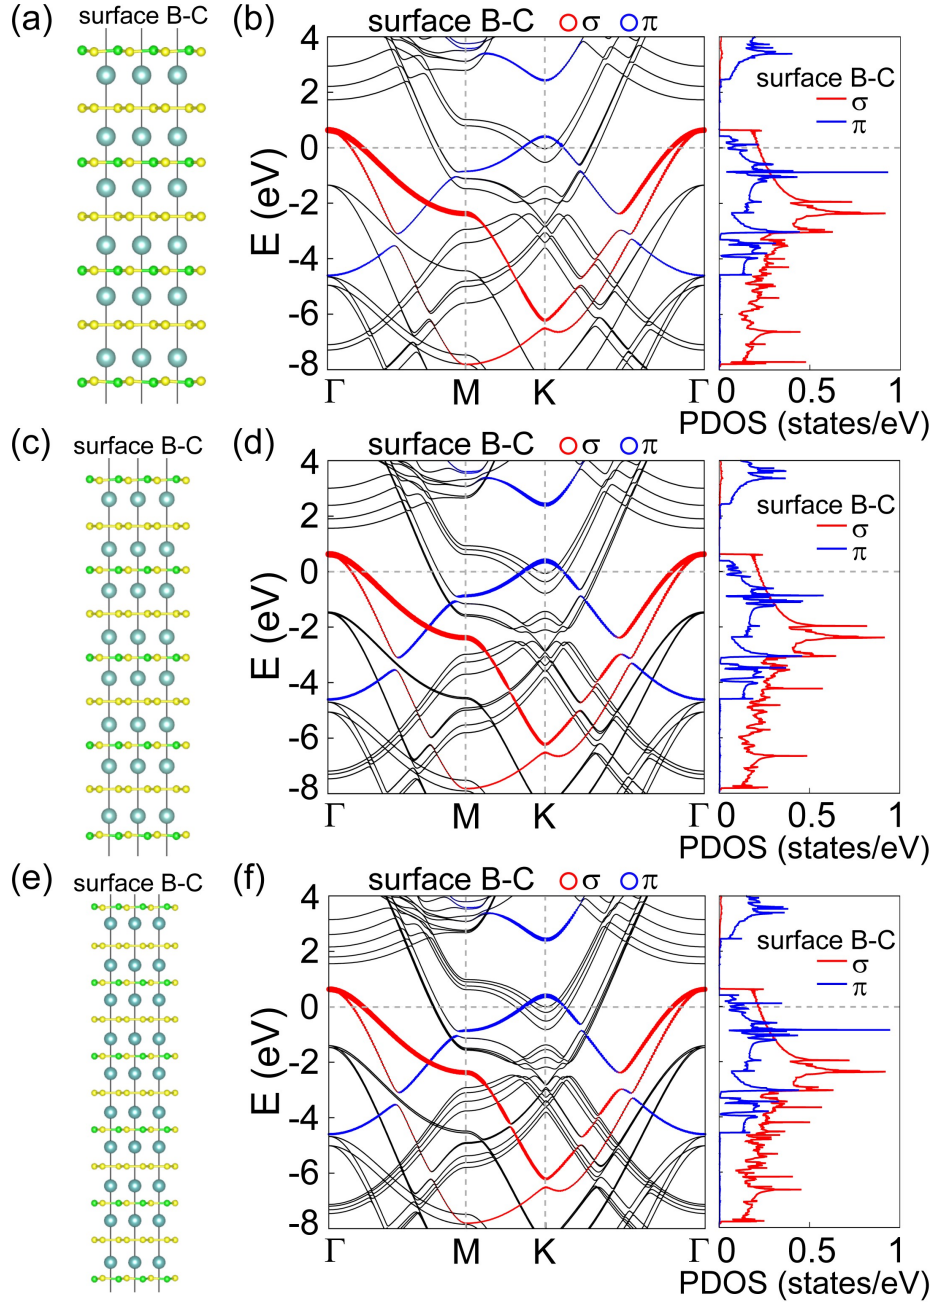

Figure S5: (a)  $\text{Li}_2\text{BC}_3$  surface model consists of six Li layers and seven B-C/C-C layers, and (b) shows the corresponding band structure and PDOS with projected onto surface B-C  $\sigma$  and  $\pi$  orbitals. (c)  $\text{Li}_2\text{BC}_3$  surface models consists of eight Li layers and nine B-C/C-C layers, and (d) shows the corresponding band structure and PDOS with projected onto surface B-C  $\sigma$  and  $\pi$  orbitals. (e)  $\text{Li}_2\text{BC}_3$  surface models consists of ten Li layers and eleven B-C/C-C layers, and (f) shows the corresponding band structure and PDOS with projected onto surface B-C  $\sigma$  and  $\pi$  orbitals.

## 6. The band structure and density of states of bulk LiBC.

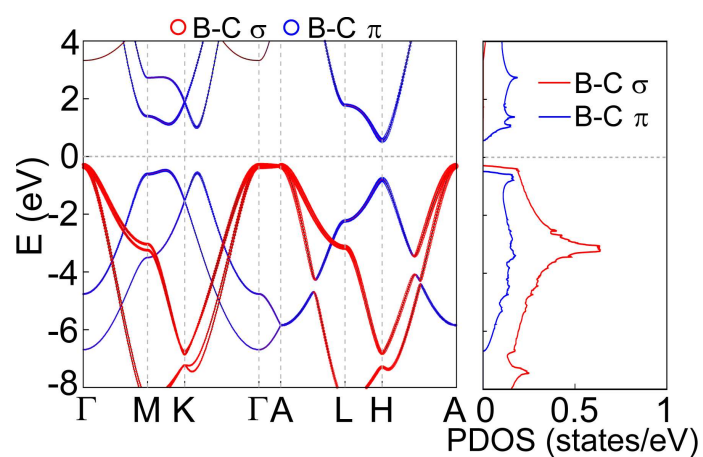

Figure S6: Calculated band structure and partial density of states (PDOS), together with projection of their electronic states onto the  $\sigma$ -bonding states of B-C  $p_x/p_y$  orbitals and the  $\pi$ -bonding states of B-C  $p_z$  orbitals, respectively.

7. The structures, band structures and density of states of LiBC surface models with different layer thicknesses.

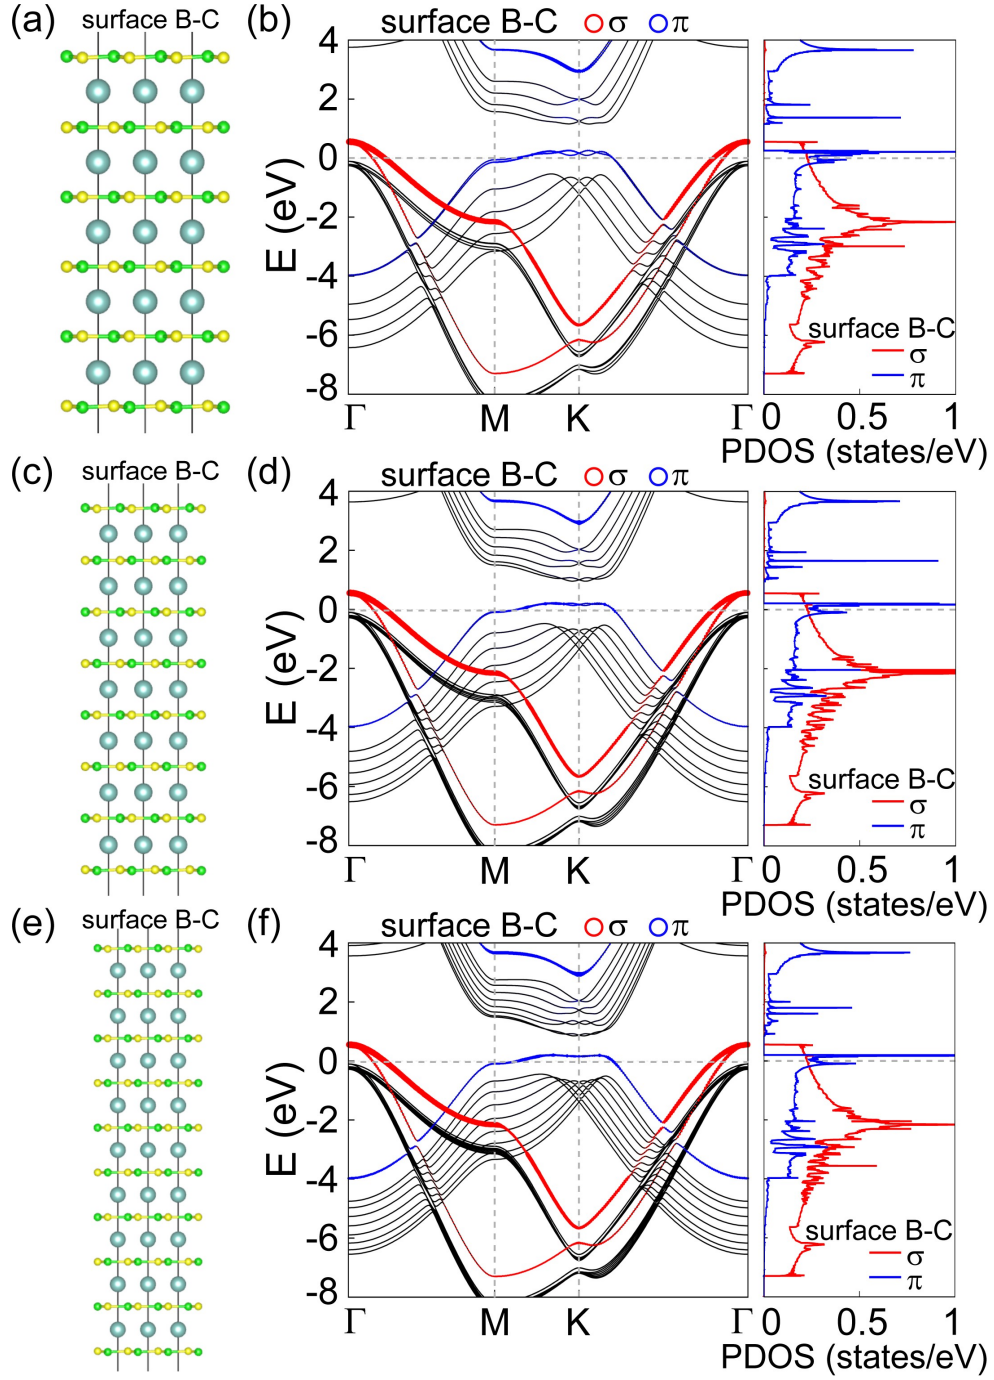

Figure S7: (a) LiBC surface model consists of five Li layers and six B-C layers, and (b) shows the corresponding band structure and PDOS with projected onto surface B-C  $\sigma$  and  $\pi$  orbitals. (c) LiBC surface models consists of seven Li layers and eight B-C layers, and (d) shows the corresponding band structure and PDOS with projected onto surface B-C  $\sigma$  and  $\pi$  orbitals. (e) LiBC surface model consists of nine Li layers and ten B-C layers, and (f) shows the corresponding band structure and PDOS with projected onto surface B-C  $\sigma$  and  $\pi$  orbitals.

## 8. The vibration modes of bulk LiBC layers

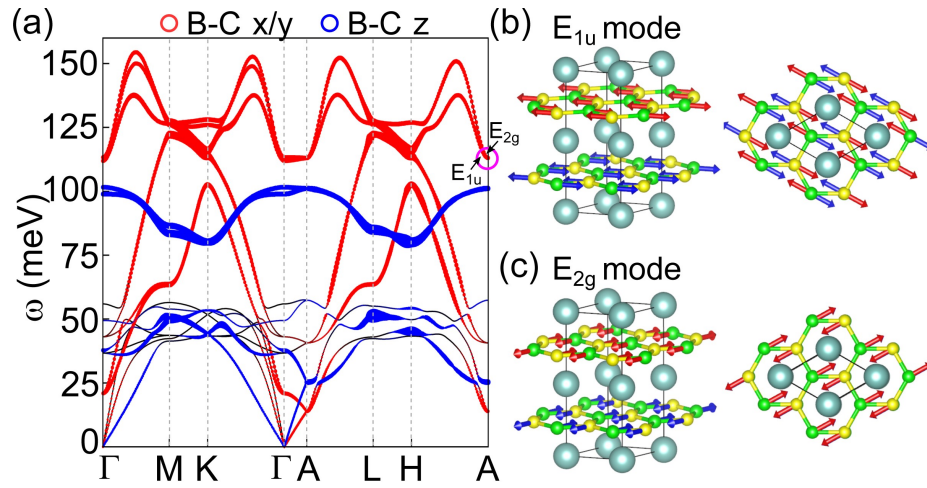

Figure S8: (a) The calculated phonon spectrum of bulk LiBC with the weighted atom-vibration modes. (b) and (c) show the in-plane stretching modes ( $E_{1u}$  and  $E_{2g}$ ) of B-C layers.

## 9. The vibration patterns of surface B-C in-plane modes

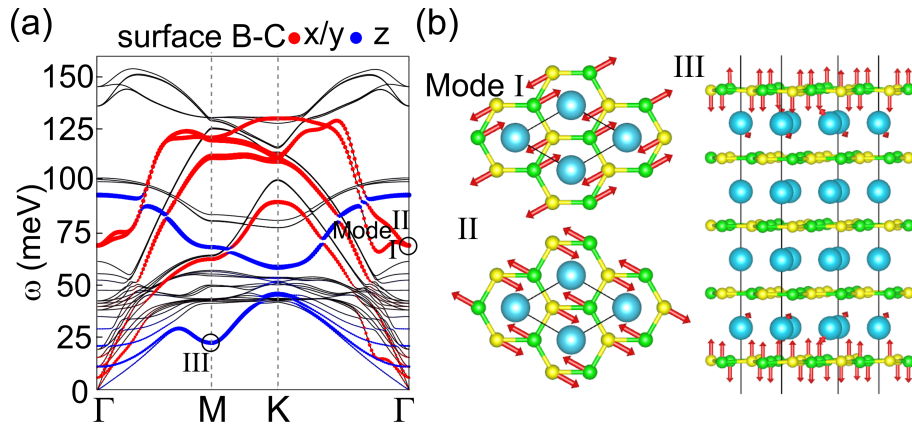

Figure S9: (a) The calculated phonon spectrum of LiBC surface with the projection of surface B-C in-plane vibration modes. (b) The vibration patterns of surface B-C in-plane stretching Modes I and II, and vibration pattern of out-of-plane Mode III.

## 10. The calculated electron-phonon coupling of LiBC surface

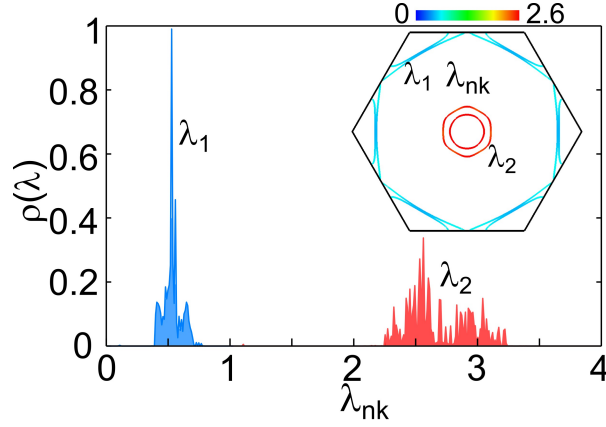

Figure S10: Distribution  $\rho(\lambda)$  of  $k$ -resolved EPC constant  $\lambda_{nk}$  and the projection of the  $\lambda_{nk}$  on each FS sheet. The two separated regimes of  $\lambda_{nk}$  are indicated as  $\lambda_1$  and  $\lambda_2$ .

## 11. The calculated electronic structures of MgB<sub>2</sub> film

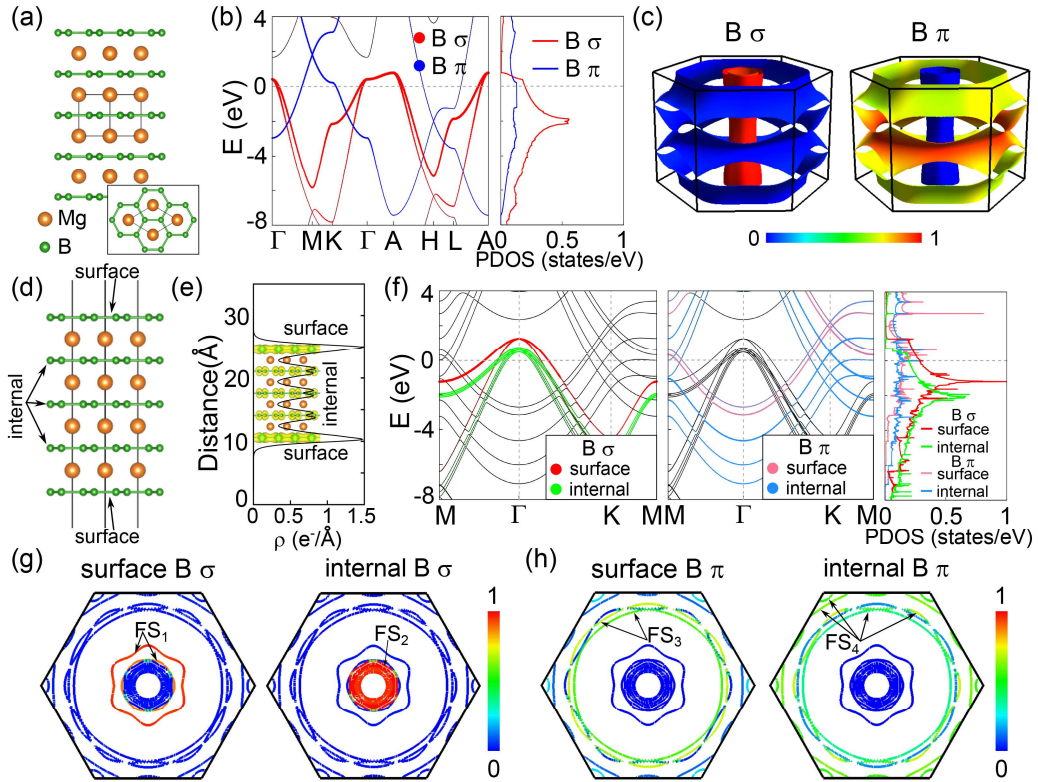

Figure S11: (a) The structure of bulk MgB<sub>2</sub>. (b) Calculated band structure and partial density of states (PDOS) for bulk MgB<sub>2</sub>, together with (c) distribution of B  $\sigma$  ( $p_x/p_y$ ) and  $\pi$  ( $p_z$ ) orbitals on the Fermi surface using the color scale in the range [0,1]. (d) The optimized MgB<sub>2</sub> surface with B termination. (e) Calculated partial charge density of MgB<sub>2</sub> surface. (f) Band structure of MgB<sub>2</sub> surface together with PDOS, as projected onto the surface B  $\sigma/\pi$  orbitals, and internal B  $\sigma/\pi$  orbitals. (g) Distribution of surface

and internal B  $\sigma$  orbitals and (h) surface and internal  $\pi$  orbitals on the Fermi surface using the color scale in the range [0,1].

The previous experimental and theoretical researches have studied the superconductivity of  $\text{MgB}_2$  film, and reported that surface would suppress the electron-phonon coupling (EPC) and SC with the  $T_c$  reduced to  $\sim 30$  K from the 39 K of bulk [2-5], while the detailed microscopic mechanism is still absent. Here, we redo the superconducting calculation to clearly exhibit the role of surface in superconductivity (SC) of  $\text{MgB}_2$  film.

Figs. S11(a)-(c) shows the calculated band structure, density of states (DOS) and Fermi surface (FS) of bulk  $\text{MgB}_2$ . It is seen that different from the cases of bulks  $\text{LiBC}$  and  $\text{Li}_2\text{BC}_3$ , in which B-C  $\sigma$  states are below the Fermi level ( $E_F$ ) [see Fig. S1 and Fig. S5 of Supporting information], the B  $\sigma$  states in bulk  $\text{MgB}_2$  are crossing the  $E_F$  and exhibit the metallic property. The reason is that the attractive potential of  $\text{Mg}^{2+}$  between B layers lowers the  $\pi$  bands of B layers, resulting in  $\sigma$ - $\pi$  charge transfer that drives the hole doping of the  $\sigma$  bands [6]. Accordingly, the metallic  $\sigma$  states of B layer could effectively couple with the B in-plane stretching modes, giving rise to the large EPC constant and high  $T_c$  of 39 K in bulk  $\text{MgB}_2$  [6,7].

To study the superconducting properties of  $\text{MgB}_2$  (0001) surface, the symmetrical surface slab model with B termination is adopted, as shown in Fig. S11(d). It is seen that in this structure, there are two kind of B layers, i.e., one is the surface exposed layer, and the other are internal layers, which have similar coordination environments to B layer of bulk  $\text{MgB}_2$ . Here, in  $\text{MgB}_2$  surface, considering that there are two kinds of B layers (surface and internal) and orbitals ( $\sigma$  and  $\pi$ ), the calculated band structure and PDOS are projected on the surface and internal B  $\sigma/\pi$  orbitals, respectively (see Fig. S11(f)). Naturally, the FS sheets can be divided into four independent parts according to the orbital distributions, as shown in Figs. S11(g) and S11(h), and these sheets are marked as the  $\text{FS}_1$ ,  $\text{FS}_2$ ,  $\text{FS}_3$  and  $\text{FS}_4$ , respectively. It is seen that because surface symmetry reduction induces hole self-doping into surface B layer, its  $\sigma$ -bonding states are driving to move upward energetically associated with the new emergency of a larger hexagon FS sheet (i.e., the  $\text{FS}_1$ ). Accordingly, surface B layer obtains a larger electronic occupation near  $E_F$ , and its  $\sigma$ -bonding strength gets enhanced compared to those of internal B layers [see the calculated DOS in Fig. S11(f) and partial charge distribution in Fig. S11(e)]. These calculated results are consistent with the previous report that surface could enhance  $\sigma$  states and its bonding nature of surface B layer in  $\text{MgB}_2$  film [2,5].

## 12. The superconducting properties of MgB<sub>2</sub> film

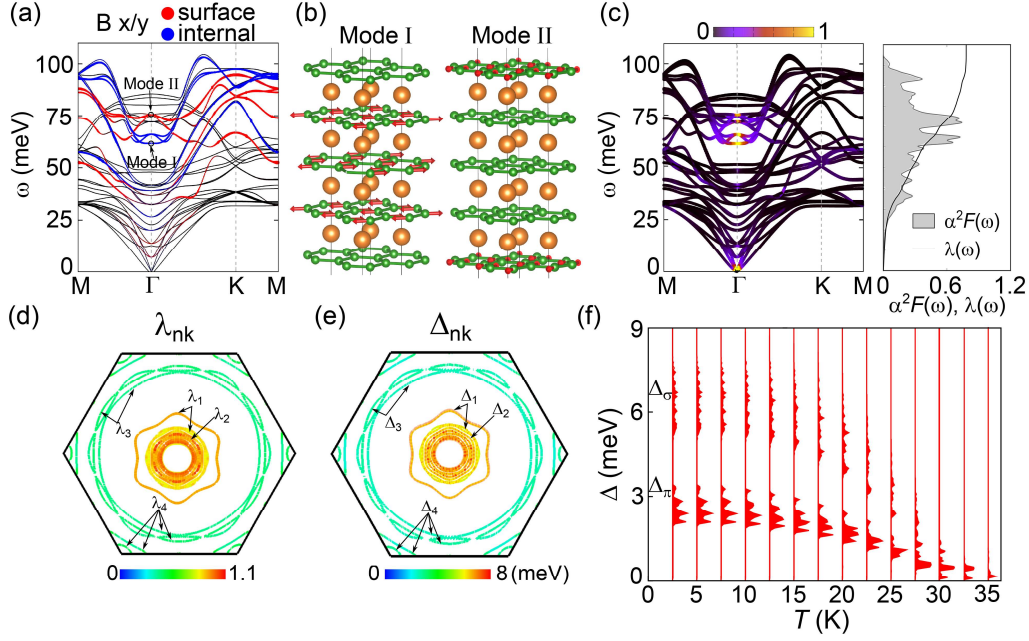

Figure S12: (a) The phonon spectrum with the projection of surface and bulk B in-plane vibration modes. (b) Atomic displacements of the Modes I for internal B layers and Mode II for the surface B layers, labeled as indicated in (a). (c) Phonon spectrum with projection of EPC strength  $\lambda_{qv}$  using the color scale in the range  $[0,1]$ , and the isotropic Eliashberg spectral function  $\alpha^2 F(\omega)$  with the integrated isotropic EPC constant  $\lambda(\omega)$ . (d) Projection of the  $k$ -resolved EPC constant  $\lambda_{nk}$  on each FS sheet. (e) Projection of  $k$ -resolved superconducting gaps  $\Delta_{nk}$  on each FS sheet. (f) Energy distribution of the anisotropic superconducting gap  $\Delta$  of MgB<sub>2</sub> surface as a function of temperature  $T$ .

Here, we turn to examine the vibration properties and EPC of MgB<sub>2</sub> surface. Fig. S11(a) shows the calculated phonon spectrum with the projection of surface and internal B in-plane vibrations. Here, it is worth noting that compared to the internal B vibrations [such as Mode I in Fig. S12 (b)], surface B in-plane stretching mode at  $\Gamma$  point (such as Mode II in Fig. S12) gets stiffness due to the enhanced  $\sigma$ -bonding strength, and their phonon energies are increased to  $\sim 75$  meV from  $\sim 62$  meV of internal B layers (B layer in bulk MgB<sub>2</sub>:  $\sim 62.6$  meV). This feature is totally different from the case of LiBC and Li<sub>2</sub>BC<sub>3</sub> surfaces that surface induces phonon softness. Accordingly, the calculated EPC strength  $\lambda_{qv}$  in Fig. S12(c) shows that these stiffed surface phonon modes result in the decrease of the values  $\lambda_{qv}$  to  $\sim 0.8$ , while the values  $\lambda_{qv}$  contributed by internal B layers are  $\sim 1.0$ . Additionally, this surface-weakened EPC strength is also manifested by the  $k$ -resolved EPC constant  $\lambda_{nk}$ , as shown in Fig. S12(d). It is seen that the FS<sub>1</sub> contributed by surface B-C  $\sigma$  states, has a relatively small value of  $\lambda_1 = \sim 0.8$ , compared to the  $\lambda_2 = \sim 1.0$  of the FS<sub>2</sub> contributed by the internal B  $\sigma$  states [see Fig. S11(g) and Fig. S12(d)]. Naturally, surface B  $\sigma$  states produce a smaller superconducting gap. Fig. S11(e) shows that the value  $\Delta_1$  contributed by the FS<sub>1</sub> is  $\sim 7$  meV, while the value  $\Delta_2$  by the FS<sub>2</sub> is  $\sim 8$  meV. The  $\Delta_1$  and  $\Delta_2$  together form the superconducting gap  $\Delta_\sigma$  [see Fig. S12(f)], and the  $\Delta_3$  and  $\Delta_4$  contributed by the FS<sub>3</sub> and FS<sub>4</sub> of surface and internal B  $\pi$  states together form the superconducting gap  $\Delta_\pi$ . With the temperature  $T$  increasing, the gap  $\Delta_\sigma$  combined with gap  $\Delta_\pi$  produced get closed around 35 K, indicating the  $T_c$  is 35 K in

MgB<sub>2</sub> surface, which is slightly smaller than  $T_c = 39$  K of bulk. This calculation is consistent with previous experimental and theoretical results [3,4], and gives a clear explanation that surface phonon stiffness suppresses the SC in MgB<sub>2</sub> film.

#### Reference

- [1] V. Sunko, D. Milosavljević, F. Mazzola, O. J. Clark, U. Burkhardt, T. K. Kim, H. Rosner, Yu. Grin, A. P. Mackenzie, and P. D. C. King, Surface and bulk electronic structure of aluminium diboride, *Phys. Rev. B*, 102, 035143 (2020).
- [2] I. G. Kim, J. I. Lee, B. I. Min, and A. J. Freeman, Surface electronic structures of superconducting thin film MgB<sub>2</sub>(0001). *Phys. Rev. B*, 64, 020508 (2001).
- [3] J. Bekaert, L. Bignardi, A. Aperis, P. van Abswoude, C. Mattevi, S. Gorovikov, L. Petaccia, A. Goldoni, B. Partoens, P. M. Oppeneer, F. M. Peeters, M. V. Milosevic, P. Rudolf, and C. Cepek, Free surfaces recast superconductivity in few-monolayer MgB<sub>2</sub>: Combined first-principles and ARPES demonstration. *Scientific Reports*, 7, 14458 (2017).
- [4] H. Schmidt, J. F. Zasadzinski, K. E. Gray, and D. G. Hinks, Energy gap from tunneling and metallic contacts onto MgB<sub>2</sub>: Possible evidence for a weakened surface layer. *Phys. Rev. B*, 63, 220504 (2001).
- [5] Z. Y. Li, J. L. Yang, J. G. Hou, and Q. S. Zhu, First-principles study of MgB<sub>2</sub> (0001) surfaces. *Phys. Rev. B*, 65, 100507 (2002).
- [6] J. M. An and W. E. Pickett, Superconductivity of MgB<sub>2</sub>: Covalent bonds driven metallic. *Phys. Rev. Lett.*, 86, 4366 (2001).
- [7] H. J. Choi, D. Roundy, H. Sun, M. L. Cohen, and S. G. Louie, The origin of the anomalous superconducting properties of MgB<sub>2</sub>. *Nature (London)* 418, 758 (2002).
